# Supplementary material for: Okadaic Acid Is at Least as Toxic as Dinophysistoxin-1 after Repeated Administration to Mice by Gavage
Source: MDPI journal article supplement (doi:10.3390/toxins15100587), 2023-09-23
Supplement: s1 [file s1]

Supplementary Materials

# Okadaic Acid Is at Least as Toxic as Dinophysistoxin-1 after Repeated Administration to Mice by Gavage

Se Yong Park, Ju-Hee Kang, Hyun Jin Jung, Jung Ho Hwang, Hyang Sook Chun, Yeo Sung Yoon and Seung Hyun Oh

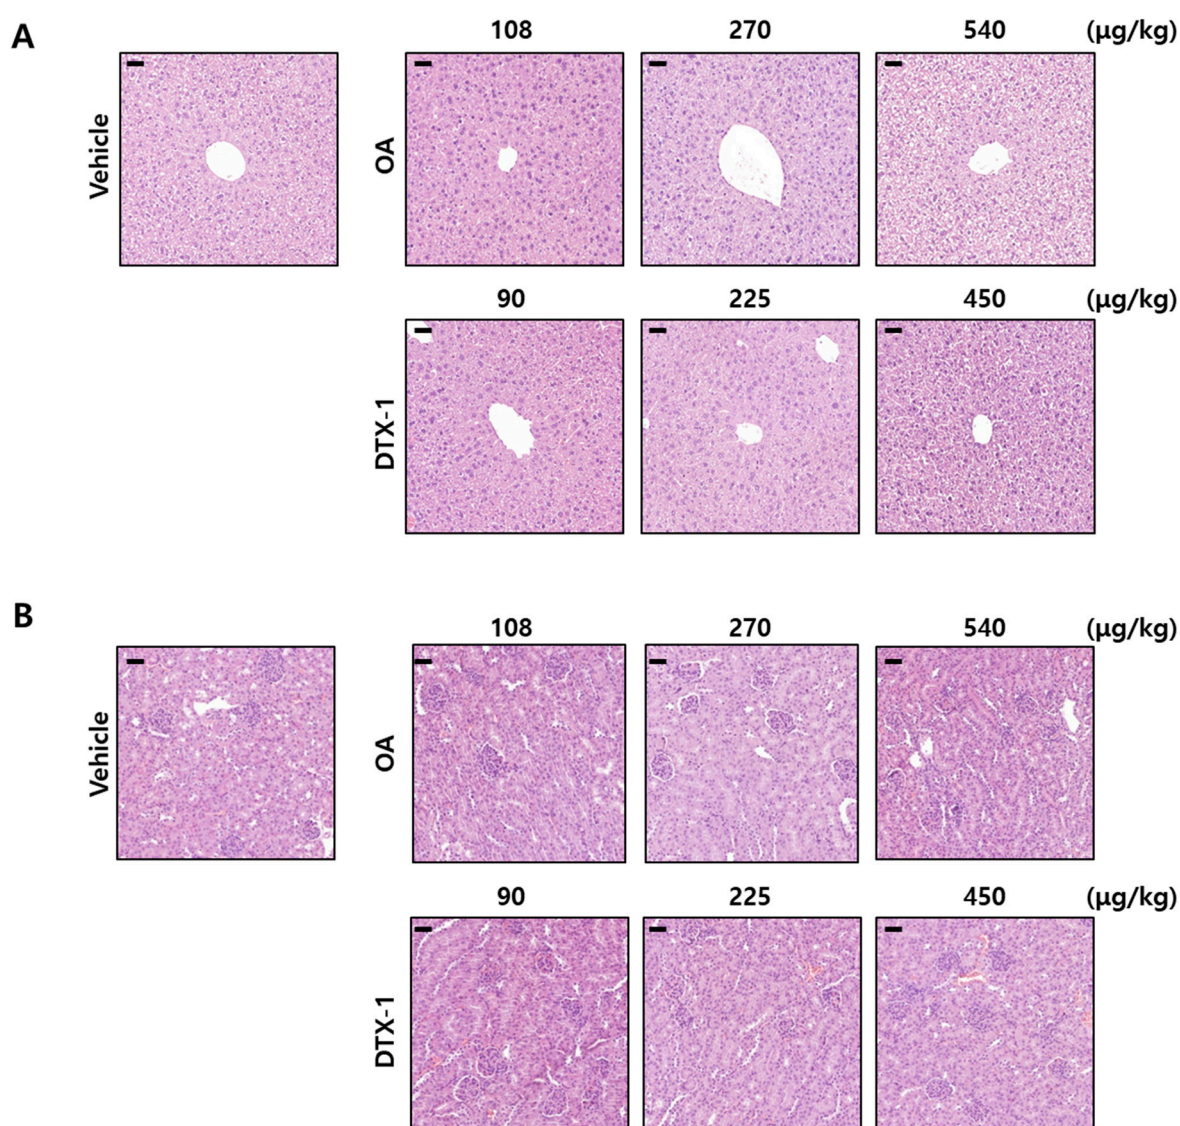

**Figure S1.** No histopathological changes were observed in liver and kidney after repeated gavage of OA and DTX-1. Representative images of HE-stained liver (A) and Kidney (B) are shown. Scale bar; 100 µm.
